# Supplementary material for: RIPK1 mutations causing infantile-onset IBD with inflammatory and fistulizing features
Source: PubMed Central journal article supplement (PMC9716469; doi:10.3389/fimmu.2022.1041315), 2022-11-18
Supplement: DataSheet_1.pdf [file DataSheet_1.pdf]

# Supplemental Figure 1

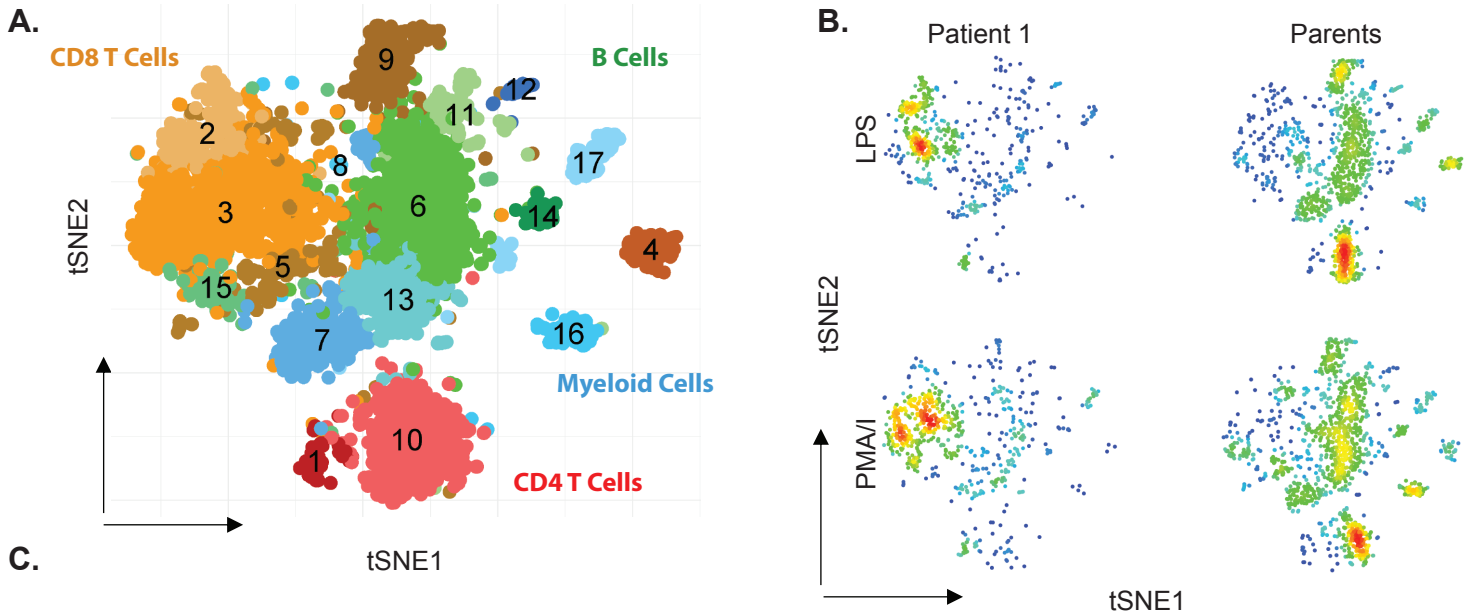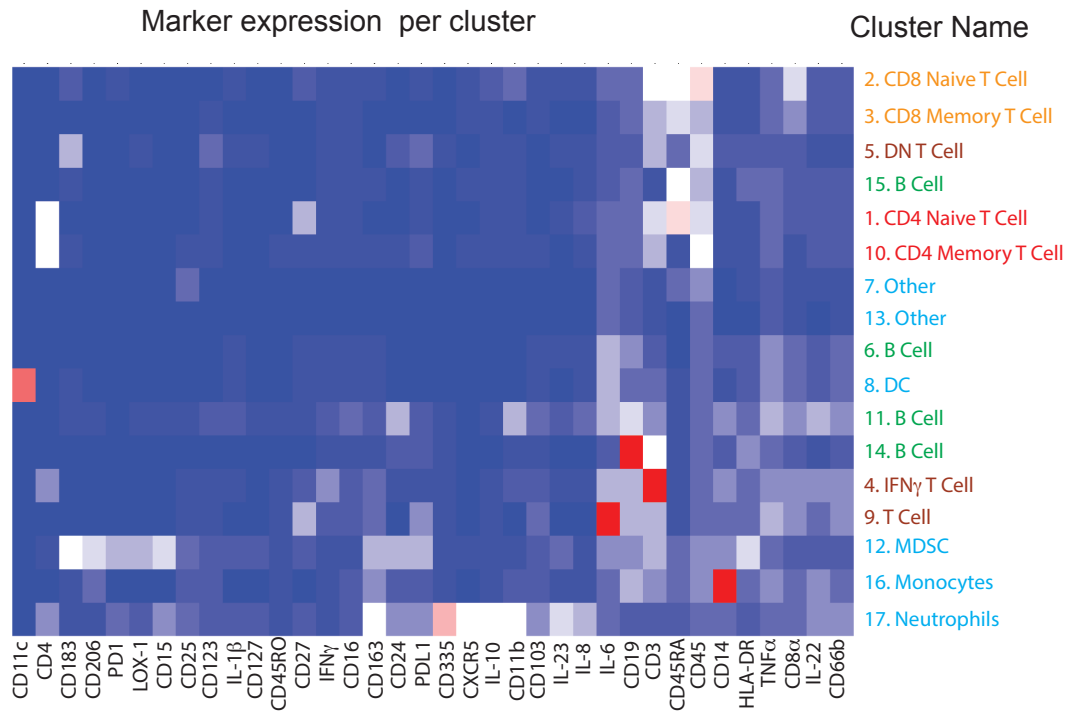

**Supplemental Figure 1. Immune dysregulation in RIPK1 deficiency.** tSNE of Phenograph analysis of peripheral blood mononuclear cells (PBMCs) stimulated with either LPS or PMA/I as a (A) conglomerate of all samples with individual cellular population shown or as (B) density plots of the individual groups. (C) Heatmap of the markers expressed in each cluster

| <b>Metal</b> | <b>Antibody</b> |
|--------------|-----------------|
| 89           | CD45            |
| 115          | CD11c           |
| 141          | CD66b           |
| 142          | CD19            |
| 143          | HLA-DR          |
| 144          | CD64            |
| 145          | CD16            |
| 146          | CD8 $\alpha$    |
| 147          | CD45RO          |
| 148          | CD103           |
| 149          | CD25            |
| 150          | CD38            |
| 151          | CD123           |
| 152          | CD14            |
| 153          | CD45RA          |
| 154          | CD163           |
| 155          | CD27            |
| 156          | CCR4            |
| 158          | CD3             |
| 159          | CCR7            |
| 161          | CD203c          |
| 162          | CD56            |
| 163          | CD183 (CXCR)    |
| 164          | CD15            |
| 166          | CD24            |
| 167          | LOX-1           |
| 168          | CD206           |
| 169          | CD11b           |
| 171          | CD127           |
| 172          | IgM             |
| 173          | CD335           |
| 174          | CD4             |
| 175          | IgD             |
| 209          | CXCR5           |

**Supplementary Table 1. Surface antibody panel used for general phenotyping CyTOF analysis.**

| <b>Metal</b> | <b>Antibody</b> |
|--------------|-----------------|
| 89           | CD45            |
| 115          | CD11c           |
| 141          | CD66b           |
| 142          | CD19            |
| 143          | HLA-DR          |
| 144          | TNF $\alpha$    |
| 145          | CD16            |
| 146          | CD8 $\alpha$    |
| 147          | CD45RO          |
| 148          | CD103           |
| 149          | CD25            |
| 150          | IL-22           |
| 151          | CD123           |
| 152          | CD14            |
| 153          | CD45RA          |
| 154          | CD163           |
| 155          | CD27            |
| 156          | IL-6            |
| 158          | CD3             |
| 159          | CCR7            |
| 160          | IFN $\gamma$    |
| 161          | IL-23p19        |
| 162          | IL-1 $\beta$    |
| 163          | CD183 (CXCR)    |
| 164          | CD15            |
| 166          | CD24            |
| 167          | LOX-1           |
| 168          | CD206           |
| 169          | CD11b           |
| 170          | IL-8            |
| 171          | CD127           |
| 172          | PDL1            |
| 173          | CD335           |
| 174          | CD4             |
| 175          | PD1             |
| 176          | IL-10           |

**Supplementary Table 2. Antibody panel used for stimulated CyTOF analysis.**

| <b>Blood test</b>                    | <b>Patient 1</b> | <b>Patient 2</b> | <b>Normal range</b>            |
|--------------------------------------|------------------|------------------|--------------------------------|
| IgG                                  | 669              | 951              | 700-1600 mg/dL                 |
| IgA                                  | 270              | 77               | 70-500 mg/dL                   |
| IgM                                  | 105              | 46               | 26-100 mg/dL                   |
| IgE                                  | 69               |                  | 0-90 mg/dL                     |
| TREC                                 | 2,287            | 2,179            | >400 copies/0.5 mcg DNA        |
| WBC (cells/mm <sup>3</sup> )         | 21,000           | 6,790            |                                |
| Lymphocytes (cells/mm <sup>3</sup> ) | 8,127 (38.7%)    | 3,530 (52.0%)    |                                |
| CD3 (cells/mm <sup>3</sup> )         | 6,339 (78.0%)    | 2,471 (70.0%)    |                                |
| CD4 (cells /mm <sup>3</sup> )        | 2,601 (32.0%)    | 741 (21.0%)      | 436-1394 cells/mm <sup>3</sup> |
| CD8 (cells/mm <sup>3</sup> )         | 3,576 (44.0%)    | 1,377 (39.0%)    | 166-882 cells/mm <sup>3</sup>  |
| CD20 (cells/mm <sup>3</sup> )        | 650 (8.0%)       | 812 (23.0%)      | 50-300 cells/mm <sup>3</sup>   |

**Supplementary Table 3: Laboratory work-up of the patients.**
